# Supplementary material for: Theoretical study of the oxidation reactions of sulfurous acid/sulfite with ozone to produce sulfuric acid/sulfate with atmospheric implications
Source: Royal Society of Chemistry journal article supplement (doi:10.1039/c8ra00411k), 2018-01-01
Supplement: c8ra00411k1.pdf [file c8ra00411k1.pdf]

Supporting Information

**Theoretical Study of Oxidation Reactions of Sulfurous Acid/Sulfite with Ozone**

**to Produce Sulfuric Acid/Sulfate with Atmospheric Implications**

Fang Sheng<sup>1</sup>, Liu Jingjing<sup>2\*</sup>, Chen Yu<sup>1</sup>, Fu-Ming Tao<sup>3</sup>, Duan XueMei<sup>1\*</sup>, Liu Jing-yao<sup>1</sup>

<sup>1</sup>Institute of Theoretical Chemistry, Jilin University, Changchun 130023, China

<sup>2</sup>Department of Chemistry and Key Laboratory of Organic Optoelectronics & Molecular

Engineering of Ministry of Education, Tsinghua University, Beijing 100084, China.

<sup>3</sup>Department of Chemistry and Biochemistry, California State University, Fullerton, California

92834, United States

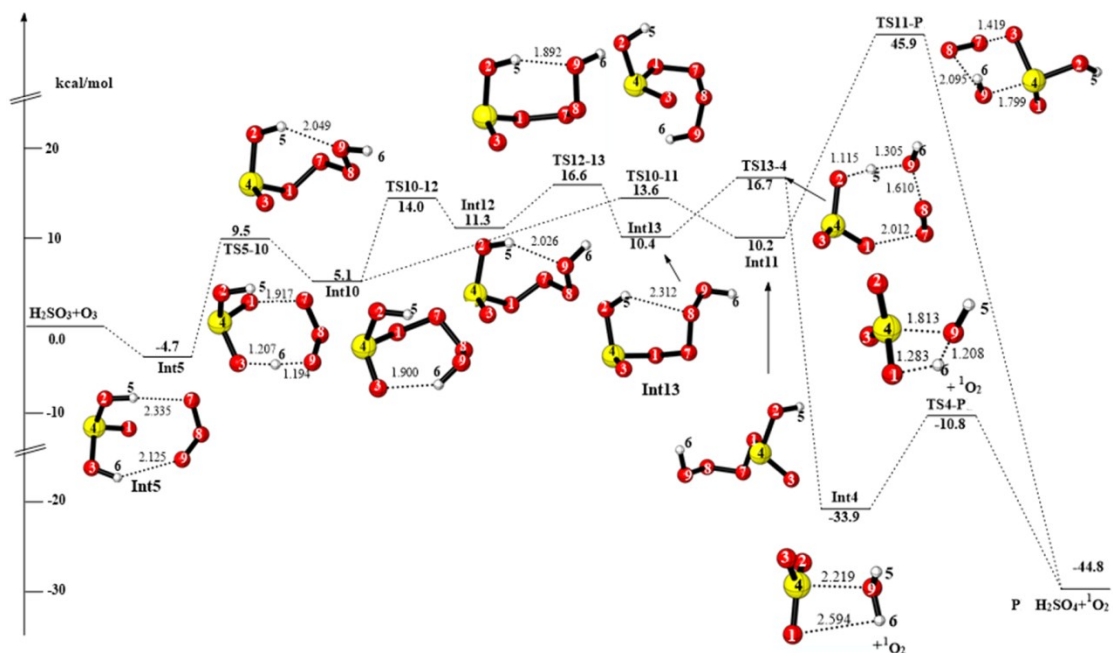

**Fig. S1** CCSD(T)/aug-cc-pVTZ // M06-2X /6-311++G(3df,3pd) energy profile and the optimized geometries of the stationary points for the reaction of  $\text{H}_2\text{SO}_3 + \text{O}_3$  (distances are in angstroms)

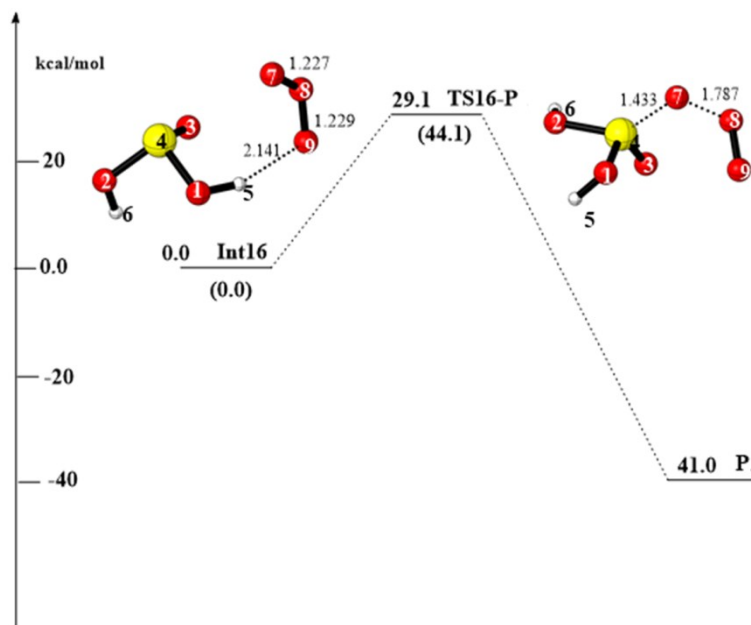

**Figure S2** CCSD(T)/aug-cc-pVTZ // M06-2X /6-311++G(3df,3pd) + ZPE energy profile and the optimized geometries of the stationary points for the reaction of H<sub>2</sub>SO<sub>3</sub> + O<sub>3</sub>. The data in brackets are calculated at CASPT2//CASSCF/ aug-cc-pVTZ level of theory. (distances are in angstroms).

**Table S1** Molecular orbitals and occupation numbers of Int16 from the CASSCF calculations

| Orbital NO. | CAS(12e,12o)                                                                        | Occ. | Orbital NO. | CAS(12 e,12o) | Occ.                                                                                  |
|-------------|-------------------------------------------------------------------------------------|------|-------------|---------------|---------------------------------------------------------------------------------------|
| HOMO        | 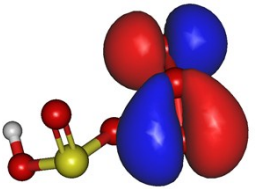   | 1.78 | LOMO        | 0.22          |    |
| HOMO-1      |    | 1.97 | LOMO -1     | 0.33          |    |
| HOMO-2      |   | 1.97 | LOMO -2     | 0.029         |   |
| HOMO-3      |  | 1.97 | LOMO-3      | 0.025         |  |
| HOMO-4      |  | 1.97 | LOMO-4      | 0.024         |  |
| HOMO-5      |  | 1.98 | LOMO-5      | 0.015         |  |

**Table S2** Molecular orbitals and occupation numbers of TS16-P from the CASSCF calculations.

| Orbital NO. | CAS(12e,12o)                                                                        | Occ. | Orbital NO. | CAS(12 e,12o) | Occ.                                                                                  |
|-------------|-------------------------------------------------------------------------------------|------|-------------|---------------|---------------------------------------------------------------------------------------|
| HOMO        | 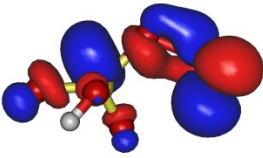   | 1.37 | LOMO        | 0.63          |    |
| HOMO-1      |    | 1.94 | LOMO -1     | 0.065         |    |
| HOMO-2      |   | 1.96 | LOMO -2     | 0.039         |   |
| HOMO-3      |  | 1.97 | LOMO-3      | 0.026         |  |
| HOMO-4      |  | 1.98 | LOMO-4      | 0.017         |  |
| HOMO-5      |  | 1.98 | LOMO-5      | 0.013         |  |

## Rate Constant Calculations

For reaction (R1), there are two successive unimolecular reaction steps from Int1, and the total unimolecular rate constants can be calculated according to canonical unified statistical theory as expressed by eq 1:

$$\frac{1}{k_{uni}} = \frac{1}{k_{1-2}} + \frac{1}{k_{2-P}} \quad (1)$$

When applying the steady-state approximation for Int1, and assuming that Int1 is in equilibrium with the initial reactants, the total rate constants can be obtained from

$$k = \frac{k_1 k_{uni}}{k_{-1} + k_{uni}} \quad (2)$$

When  $k_{uni} \ll k_{-1}$ , the total rate constants can be obtained from eq 3:

$$k = K_{eq} k_{uni} \quad (3)$$

where  $K_{eq}$  is the equilibrium constant for the formation of Int1 and was calculated using the MultiWell software.<sup>1</sup>  $k_{uni}$  were carried out in terms of the transition state theory (TST) with Wigner Tunneling corrections and KiSTheP software<sup>2</sup> was used. With regard to reaction (2), the total rate constants were obtained according to the following eq 4.

$$\frac{1}{k} = \frac{1}{k_{R-14}} + \frac{1}{k_{14-P}} \quad (4)$$

For the  $\text{HSO}_3^- + \text{O}_3$  reaction, the energy barrier of TS1-P is merely 0.3 kcal/mol, which indicates that  $k_{-1}'$  is not much greater than  $k_{uni}'$ . Accordingly, the overall rate constants are evaluated according to eq 5, where  $k_1'$  is calculated by hard-sphere collision theory<sup>3</sup> accompanied by obtaining  $k_{-1}$  based on the data of  $K_{eq}'$  and  $k_{-1}'$ .

$$k' = \frac{k_1' k_{uni}'}{k_{-1}' + k_{uni}'} \quad (5)$$

1 (a) J. R. Barker, T. L. Nguyen, J. F. Stanton, C. Aieta, M. Ceotto, F. Gabas, T. J. D. Kumar, C. G. L. Li, L. L. Lohr, A. Maranzana, N. F. Ortiz, J. M. Preses, J. M. Simmie, J. A. Sonk, and P. J. Stimac; MultiWell-2017 Software Suite; J. R. Barker, University of Michigan, Ann Arbor, Michigan, USA, 2016; <http://clasp-research.engin.umich.edu/>

[multiwell/](#). (b) John R. Barker, *Int. J. Chem. Kinetics*, 33, 232-45 (2001). (c) John R. Barker, *Int. J. Chem. Kinetics*, 41, 748-763 (2009).".

2 S. Canneaux, F. Bohr and E. Henon, *Journal of Computational Chemistry*, 2014, **35**, 82-93.

3 W. H. Miller, *Journal of Chemical Physics*, 1976, **65**, 2216-2223.

**Table S3** The electronic energies, ZPE, and T1 diagnostic values of the stationary points in H<sub>2</sub>SO<sub>3</sub>+O<sub>3</sub> reaction (Energy unit: Hartree)

| Species                        | E <sub>elect</sub> , M062x | ZPE      | E <sub>elect</sub> , CCSD(T) | T1 diagnostic value |
|--------------------------------|----------------------------|----------|------------------------------|---------------------|
| H <sub>2</sub> SO <sub>3</sub> | -625.05417                 | 0.03359  | -624.33004                   | 0.017               |
| O <sub>3</sub>                 | -225.39663                 | 0.008152 | -225.14923                   | 0.024               |
| <sup>1</sup> O <sub>2</sub>    | -700.28673                 | 0.040145 | -699.46154                   | 0.015               |
| H <sub>2</sub> SO <sub>4</sub> | -150.25992                 | 0.004046 | -150.09154                   | 0.015               |
| Int1                           | -850.45857                 | 0.043578 | -849.48564                   | 0.021               |
| Int2                           | -850.54957                 | 0.04819  | -849.54909                   | 0.017               |
| Int3                           | -850.54306                 | 0.04805  | -849.54288                   | 0.017               |
| Int4                           | -700.26348                 | 0.03869  | -699.44279                   | 0.016               |
| Int5                           | -850.46197                 | 0.04367  | -849.48864                   | 0.020               |
| Int6                           | -850.51798                 | 0.04660  | -849.5216                    | 0.017               |
| Int7                           | -850.52193                 | 0.04686  | -849.52432                   | 0.017               |
| Int8                           | -850.54428                 | 0.04777  | -849.54387                   | 0.017               |
| Int9                           | -850.54957                 | 0.04819  | -849.54909                   | 0.016               |
| Int10                          | -850.46264                 | 0.04567  | -849.47506                   | 0.02                |
| Int11                          | -850.45279                 | 0.04505  | -849.46633                   | 0.019               |
| Int12                          | -850.45244                 | 0.04546  | -849.46499                   | 0.019               |
| Int13                          | -850.45392                 | 0.04495  | -849.46594                   | 0.02                |
| Int14                          | -850.47947                 | 0.04812  | -849.48593                   | 0.016               |
| Int15                          | -850.40811                 | 0.04587  | -849.42550                   | 0.035               |
| Int16                          | -850.4605                  | 0.04378  | -849.42059                   | 0.021               |
| TS1-2                          | -850.43147                 | 0.04156  | -849.45461                   | 0.033               |
| TS2-P                          | -850.51799                 | 0.04320  | -849.52480                   | 0.024               |
| TS2-3                          | -850.53635                 | 0.04762  | -849.53549                   | 0.017               |
| TS3-4                          | -850.49779                 | 0.04314  | -849.50513                   | 0.024               |
| TS4-P                          | -700.22609                 | 0.03572  | -699.40301                   | 0.016               |
| TS5-6                          | -850.41636                 | 0.03626  | -849.44766                   | 0.019               |
| TS6-7                          | -850.5179                  | 0.04641  | -849.52163                   | 0.017               |
| TS7-8                          | -850.47437                 | 0.04309  | -849.47919                   | 0.017               |
| TS7-9                          | -850.48522                 | 0.04350  | -849.48719                   | 0.018               |
| TS7-P                          | -850.4983                  | 0.04442  | -849.50664                   | 0.025               |
| TS8-4                          | -850.50592                 | 0.04533  | -849.51464                   | 0.024               |
| TS8-9                          | -850.52944                 | 0.04763  | -849.52938                   | 0.018               |
| TS9-P                          | -850.51799                 | 0.04320  | -849.52480                   | 0.024               |
| TSR-14                         | -850.42816                 | 0.04418  | -849.45136                   | 0.026               |
| TSR-15                         | -850.3921                  | 0.04394  | -849.42069                   | 0.035               |



|         |            |          |            |            |
|---------|------------|----------|------------|------------|
| TS15-P  | -850.37447 | 0.04231  | -849.39650 | 0.02       |
| TS14-P  | -850.44297 | 0.04470  | -849.45588 | 0.034      |
| TS14-2  | -850.46451 | 0.04429  | -849.47038 | 0.019      |
| TS5-10  | -850.43709 | 0.04005  | -849.46244 | 0.033      |
| TS10-12 | -850.44704 | 0.04422  | -849.45937 | 0.019      |
| TS12-13 | -850.4421  | 0.04416  | -849.45516 | 0.020      |
| TS10-11 | -850.44766 | 0.044705 |            | 0.01891727 |
| TS13-4  | -850.40043 | 0.039992 | -849.45088 | 0.041      |
| TS11-P  | -850.35849 | 0.042508 | -849.4069  | 0.029      |
| TS16-P  | -850.39444 | 0.042045 | -849.43925 | 0.068      |

**Table S4** The electronic energies, ZPE, and T1 diagnostic values of the stationary points in  $\text{HSO}_3^- + \text{O}_3$  reaction (Energy unit: Hartree)

| Species          | $E_{\text{elects, M062x}}$ | ZPE     | $E_{\text{elects, CCSD(T)}}$ | T1 diagnostic value |
|------------------|----------------------------|---------|------------------------------|---------------------|
| $\text{HSO}_3^-$ | -624.52347                 | 0.02158 | -623.79903                   | 0.020               |
| $\text{HSO}_4^-$ | -699.78183                 | 0.02786 | -698.95511                   | 0.016               |
| Int1'            | -849.93528                 | 0.03156 | -848.95745                   | 0.022               |
| Int2'            | -850.06497                 | 0.03648 | -849.06245                   | 0.017               |
| Int3'            | -849.93339                 | 0.03155 | -848.95907                   | 0.028               |
| Int4'            | -849.95975                 | 0.03325 | -848.97160                   | 0.021               |
| Int5'            | -849.94915                 | 0.03305 | -848.96074                   | 0.021               |
| Int6'            | -849.89721                 | 0.03232 | -848.91309                   | 0.026               |
| TS1-2'           | -849.93289                 | 0.03103 | -848.95694                   | 0.022               |
| TS2-P'           | -850.03449                 | 0.03275 | -849.03973                   | 0.024               |
| TS1-P'           | -849.93416                 | 0.03124 | -848.95666                   | 0.025               |
| TS3-4'           | -849.93165                 | 0.03071 | -848.95920                   | 0.035               |
| TS4-5'           | -849.94658                 | 0.03271 | -848.95767                   | 0.021               |
| TS5-2'           | -849.87216                 | 0.03090 | -848.91387                   | 0.031               |
| TSR-6'           | -849.89376                 | 0.02983 | -848.91156                   | 0.028               |
| TS6-P'           | -849.86390                 | 0.03105 | -848.89663                   | 0.031               |

**Table S5** The Cartesian coordinates of all species for the  $\text{H}_2\text{SO}_3/\text{HOSO}_2^- + \text{O}_3$  reaction. The Cartesian coordinates are obtained at the M06-2X /6-311++G(3df,3pd) level of theory.

|                         |             |             |             |  |
|-------------------------|-------------|-------------|-------------|--|
| $\text{H}_2\text{SO}_3$ |             |             |             |  |
| S                       | -0.00001700 | 0.11143200  | -0.43456400 |  |
| O                       | 0.00094900  | 1.35290300  | 0.31108300  |  |
| O                       | 1.23375100  | -0.73921700 | 0.15059400  |  |
| H                       | 1.46689900  | -0.39570600 | 1.02675500  |  |

|                                |             |             |             |
|--------------------------------|-------------|-------------|-------------|
| H                              | -1.46633200 | -0.39528100 | 1.02766100  |
| O                              | -1.23473600 | -0.73767600 | 0.15065000  |
| O <sub>3</sub>                 |             |             |             |
| O                              | 1.05461800  | -0.20990200 | 0.00000000  |
| O                              | 0.00000000  | 0.41968000  | 0.00000000  |
| O                              | -1.05461800 | -0.20977800 | 0.00000000  |
| <sup>1</sup> O <sub>2</sub>    |             |             |             |
| O                              | 0.00000000  | 0.00000000  | 0.59284400  |
| O                              | 0.00000000  | 0.00000000  | -0.59284400 |
| H <sub>2</sub> SO <sub>4</sub> |             |             |             |
| S                              | 0.00011600  | 0.09103200  | 0.12032300  |
| O                              | 0.00187100  | 1.49456500  | 0.19786600  |
| O                              | 0.00003800  | -0.76026400 | 1.25899200  |
| H                              | -1.55790300 | -1.17523100 | -0.51459600 |
| H                              | 1.55586100  | -1.17755000 | -0.51523800 |
| O                              | 1.22291500  | -0.31245100 | -0.78517600 |
| O                              | -1.22480000 | -0.30981600 | -0.78359900 |
| Int1                           |             |             |             |
| S                              | -1.26163700 | 0.11324000  | -0.37004300 |
| O                              | -2.60205800 | -0.19713800 | 0.04177600  |
| O                              | -0.72600400 | 1.05951000  | 0.82761700  |
| H                              | 0.19242600  | 1.30896900  | 0.64619200  |
| H                              | -0.64442100 | -1.58760400 | 0.77550600  |
| O                              | -0.34947700 | -1.18907400 | -0.05890500 |
| O                              | 1.74176600  | 0.66609100  | -0.88887300 |
| O                              | 2.33727600  | -0.22878600 | -0.28527200 |
| O                              | 2.17827100  | -0.30225200 | 0.92603000  |
| Int2                           |             |             |             |
| S                              | -0.71328800 | -0.17682100 | 0.01326600  |
| O                              | -1.72114800 | -0.41910900 | 0.96918600  |
| O                              | -0.15320200 | -1.17790600 | -0.81378600 |
| H                              | 1.96245900  | -0.97438700 | -0.56818500 |
| H                              | -1.70880900 | 1.61014800  | -0.48079500 |
| O                              | -1.14948600 | 0.97534100  | -0.95003300 |
| O                              | 0.46514100  | 0.50926600  | 0.85954500  |
| O                              | 1.56859500  | 0.74576000  | -0.01537800 |
| O                              | 2.38497100  | -0.35918100 | 0.05505600  |
| Int3                           |             |             |             |

|      |             |             |             |
|------|-------------|-------------|-------------|
| S    | -0.81170400 | -0.04065600 | -0.00250200 |
| O    | -1.12852100 | -0.34363600 | 1.34108100  |
| O    | -1.71584800 | -0.20749500 | -1.06563500 |
| H    | 2.02604500  | 1.12353000  | -0.18835100 |
| H    | -0.37307700 | 1.82801400  | 0.84663700  |
| O    | -0.21638300 | 1.42997400  | -0.02092700 |
| O    | 0.48828200  | -0.84428700 | -0.48131500 |
| O    | 1.55855000  | -0.56835300 | 0.41831800  |
| O    | 2.43070600  | 0.24616600  | -0.26880500 |
| Int4 |             |             |             |
| S    | 0.40805800  | -0.00010300 | -0.03598900 |
| O    | 0.37321800  | 1.22441000  | -0.74908400 |
| O    | 0.75782600  | -0.00397400 | 1.33197000  |
| H    | -2.11921900 | -0.77271500 | -0.18076900 |
| H    | -2.12201300 | 0.77565200  | -0.17578300 |
| O    | -1.78697000 | 0.00058100  | 0.28857800  |
| O    | 0.36996300  | -1.22117900 | -0.75491600 |
| Int5 |             |             |             |
| S    | 1.47768100  | 0.22536300  | 0.25864300  |
| O    | 0.39726800  | 0.19811100  | 1.22822300  |
| O    | 1.54406600  | -1.24956200 | -0.37056000 |
| H    | 0.65375900  | -1.63436000 | -0.39051600 |
| H    | -0.06820800 | 1.03675400  | -0.95899700 |
| O    | 0.90380000  | 1.04850000  | -0.99230600 |
| O    | -2.00153100 | 0.94676500  | -0.08112500 |
| O    | -2.25256800 | -0.21614900 | 0.21655000  |
| O    | -1.61959200 | -1.10369000 | -0.34938000 |
| Int6 |             |             |             |
| S    | -1.09806600 | -0.12688100 | -0.02752800 |
| O    | -1.07405500 | -0.85179400 | 1.18005800  |
| O    | -1.70104200 | 1.15016200  | -0.09302500 |
| H    | 0.98849000  | 1.61588800  | -0.59986900 |
| H    | 1.65751600  | -1.11835600 | -0.83467400 |
| O    | -0.62402000 | -0.72246000 | -1.22505800 |
| O    | 1.92972200  | -0.93110400 | 0.07631400  |
| O    | 2.26747400  | 0.40834100  | 0.05672000  |
| O    | 1.06730200  | 1.13842500  | 0.23936400  |
| Int7 |             |             |             |
| S    | -1.02929300 | 0.16158100  | 0.07096800  |
| O    | -1.77809200 | -0.14286900 | -1.08767000 |

|       |             |             |             |
|-------|-------------|-------------|-------------|
| O     | -1.20592000 | -0.59995600 | 1.24908900  |
| H     | 0.81684700  | -1.86007300 | -0.55403200 |
| H     | 1.87359900  | 1.27946000  | 0.01007200  |
| O     | -0.30249000 | 1.37996900  | 0.13551200  |
| O     | 2.45818500  | 0.52090600  | -0.15844300 |
| O     | 1.75183100  | -0.51676900 | 0.39114000  |
| O     | 0.79876600  | -0.89186600 | -0.60356900 |
| Int8  |             |             |             |
| S     | 0.82280900  | -0.04282100 | -0.00769300 |
| O     | 1.71964700  | 0.31534900  | 1.02217800  |
| O     | 1.09271800  | -1.01994500 | -0.98065300 |
| H     | -2.95969000 | 0.27397300  | 0.67963400  |
| H     | 0.17686800  | 1.95750300  | -0.17401400 |
| O     | 0.32971300  | 1.22183800  | -0.78316700 |
| O     | -2.36032500 | 0.43663800  | -0.06270000 |
| O     | -1.57283200 | -0.70090700 | -0.07061400 |
| O     | -0.50668500 | -0.44626600 | 0.82713900  |
| Int9  |             |             |             |
| S     | -0.71328800 | -0.17682100 | 0.01326600  |
| O     | -1.72114800 | -0.41910900 | 0.96918600  |
| O     | -0.15320200 | -1.17790600 | -0.81378600 |
| H     | 1.96245900  | -0.97438700 | -0.56818500 |
| H     | -1.70880900 | 1.61014800  | -0.48079500 |
| O     | -1.14948600 | 0.97534100  | -0.95003300 |
| O     | 0.46514100  | 0.50926600  | 0.85954500  |
| O     | 1.56859500  | 0.74576000  | -0.01537800 |
| O     | 2.38497100  | -0.35918100 | 0.05505600  |
| Int10 |             |             |             |
| H     | -0.87166400 | 1.51370800  | -0.22016300 |
| S     | 1.29176500  | -0.10755400 | -0.21924500 |
| O     | 0.92827200  | 1.19353100  | -0.73754200 |
| O     | 1.07980600  | -0.09143300 | 1.34926000  |
| H     | 0.20118400  | 0.26541400  | 1.57781300  |
| O     | 0.04697200  | -1.15229700 | -0.62119900 |
| O     | -1.10174800 | -1.04557000 | 0.19597500  |
| O     | -1.90376200 | -0.04359200 | -0.29067200 |
| O     | -1.54925900 | 1.13207900  | 0.37296300  |
| Int11 |             |             |             |
| H     | -1.82470400 | -1.41574400 | -0.71878600 |
| S     | 0.99203000  | -0.08779700 | -0.43353400 |

|   |             |             |             |
|---|-------------|-------------|-------------|
| O | 1.53781800  | 1.23334500  | -0.49515600 |
| O | 1.99313200  | -1.03148400 | 0.37024300  |
| H | 2.37840800  | -0.55152900 | 1.12140800  |
| O | -0.07140900 | -0.08224000 | 0.89289800  |
| O | -1.12330500 | 0.79844400  | 0.57276800  |
| O | -2.23894100 | 0.02700600  | 0.37839400  |
| O | -2.15056800 | -0.52356600 | -0.90240700 |

Int12

|   |             |             |             |
|---|-------------|-------------|-------------|
| H | 2.43432800  | -1.23693200 | 0.54818300  |
| S | -1.35181300 | 0.13514300  | -0.04674000 |
| O | -1.14802700 | -0.80657800 | -1.10810400 |
| O | -0.85414200 | -0.52529900 | 1.30661700  |
| H | -0.03655300 | -1.02690900 | 1.12637400  |
| O | -0.13457500 | 1.31268400  | -0.19372300 |
| O | 1.10589300  | 1.00060200  | 0.37112500  |
| O | 1.79093800  | 0.16926300  | -0.49117900 |
| O | 1.64381700  | -1.13797700 | -0.00057600 |

Int13

|   |             |             |             |
|---|-------------|-------------|-------------|
| H | 3.20494100  | 0.04197200  | 0.01090700  |
| S | -1.38914600 | 0.01212000  | -0.30120800 |
| O | -1.52772000 | -0.69692800 | 0.93891600  |
| O | -0.93392800 | 1.50472600  | 0.02594200  |
| H | -0.26369100 | 1.50955900  | 0.72858600  |
| O | 0.05546400  | -0.53510500 | -0.99025600 |
| O | 0.92372100  | -1.06979200 | -0.03623400 |
| O | 1.46779000  | -0.02195900 | 0.68563500  |
| O | 2.42531000  | 0.60087600  | -0.11402400 |

Int14

|   |             |             |             |
|---|-------------|-------------|-------------|
| S | 0.34379900  | -0.10323700 | -0.08031400 |
| O | 0.92440300  | -0.93869700 | -1.07870100 |
| O | 0.46154300  | -0.55016600 | 1.42200400  |
| H | -0.28065400 | -1.13799400 | 1.62417000  |
| H | 2.24490800  | 0.71697800  | -0.43872700 |
| O | 1.49341200  | 1.00097500  | 0.09414500  |
| O | -1.25066600 | -0.82848100 | -0.20224500 |
| O | -1.87986400 | 0.42164400  | -0.02563100 |
| O | -0.68195800 | 1.15382500  | -0.19712500 |

Int15

|   |             |             |             |
|---|-------------|-------------|-------------|
| S | -0.60234800 | -0.16300000 | -0.46060000 |
| O | 0.19556700  | 1.11975900  | 0.25145800  |

|       |             |             |             |
|-------|-------------|-------------|-------------|
| O     | -0.84694700 | -1.20219100 | 0.71485100  |
| H     | -1.63928900 | -0.93036200 | 1.20008200  |
| H     | -2.27093300 | 1.29180000  | -0.59894100 |
| O     | -2.01883300 | 0.63567700  | 0.05864500  |
| O     | 1.59309900  | 0.98117500  | 0.16043600  |
| O     | 1.78446400  | -0.37711900 | 0.34408700  |
| O     | 0.98612400  | -0.87648000 | -0.68341900 |
| Int16 |             |             |             |
| H     | -2.67441500 | 0.42365400  | 0.93707000  |
| S     | -1.09409600 | -0.29905400 | -0.30001300 |
| O     | -2.62046500 | -0.08217000 | 0.11069900  |
| O     | -0.74339700 | 1.28645600  | -0.36056700 |
| H     | 0.19458600  | 1.38537700  | -0.13444500 |
| O     | -0.36791900 | -0.79937300 | 0.84719200  |
| O     | 1.85957500  | -0.44648000 | -0.98787700 |
| O     | 2.36133900  | -0.28414000 | 0.11997400  |
| O     | 2.00903700  | 0.69768600  | 0.77027700  |
| TS1-2 |             |             |             |
| S     | -0.87522200 | -0.01963600 | -0.19268700 |
| O     | -2.27162600 | 0.08019800  | -0.46605100 |
| O     | -0.25850400 | 1.32662700  | 0.17565800  |
| H     | 0.81244400  | 1.20489000  | 0.28668200  |
| H     | -1.12093300 | -1.61387200 | 1.20833000  |
| O     | -0.65052000 | -0.76863200 | 1.20852500  |
| O     | 1.06503100  | -0.62545000 | -1.04466100 |
| O     | 1.82498900  | -0.57679600 | -0.04887300 |
| O     | 2.07963600  | 0.65444700  | 0.37390000  |
| TS2-P |             |             |             |
| S     | 0.68805100  | -0.10368000 | -0.06847900 |
| O     | 1.88480600  | -0.58965100 | -0.63955100 |
| O     | -0.08269600 | -1.06624600 | 0.74327400  |
| H     | -1.32649400 | -0.92119000 | 0.59902700  |
| H     | 1.75258100  | 1.55856200  | 0.65975100  |
| O     | 1.03014800  | 1.00766200  | 0.98972700  |
| O     | -0.21801900 | 0.52917700  | -1.06659900 |
| O     | -1.80733200 | 0.70131400  | -0.09751800 |
| O     | -2.23627000 | -0.45456700 | 0.05027600  |
| TS2-3 |             |             |             |
| S     | -0.79833400 | 0.05600600  | -0.06921400 |
| O     | -1.79588400 | -0.93366500 | 0.07022300  |

|   |             |             |             |
|---|-------------|-------------|-------------|
| O | -1.01626900 | 1.27995400  | -0.72723900 |
| H | 1.89719700  | 0.99736000  | 0.61711800  |
| H | -0.22438500 | -0.37194700 | 1.91982600  |
| O | -0.19488800 | 0.40510400  | 1.34259600  |
| O | 0.47560400  | -0.66616800 | -0.79204900 |
| O | 1.62545100  | -0.73932600 | 0.01791100  |
| O | 2.29355300  | 0.46391300  | -0.09013400 |

TS3-4

|   |             |             |             |
|---|-------------|-------------|-------------|
| S | -0.81335000 | -0.13364700 | -0.01621900 |
| O | -1.00010500 | -0.46440500 | 1.34946400  |
| O | -1.90608200 | 0.25615400  | -0.81996200 |
| H | 1.33079400  | 1.09675300  | 0.01795800  |
| H | -0.09701700 | 1.76144700  | 0.96860500  |
| O | 0.13841500  | 1.35307200  | 0.12403300  |
| O | 0.18887300  | -0.94011100 | -0.74420500 |
| O | 1.80285800  | -0.66913700 | 0.24024200  |
| O | 2.24851800  | 0.37444500  | -0.24045300 |

TS4-P

|   |             |             |             |
|---|-------------|-------------|-------------|
| S | -0.26881700 | -0.00079900 | 0.06361500  |
| O | -0.66250100 | 1.35536700  | 0.14568800  |
| O | -1.05865300 | -0.94778200 | -0.61640300 |
| H | 1.48670000  | -0.31429900 | 0.36323600  |
| H | 1.59214900  | 0.94369400  | -0.98451400 |
| O | 1.33322500  | 0.03379900  | -0.78372800 |
| O | 0.54070800  | -0.51846100 | 1.20487300  |

TS5-6

|   |             |             |             |
|---|-------------|-------------|-------------|
| S | -1.34484600 | -0.00101300 | -0.23183100 |
| O | -1.82741500 | 0.00116600  | 1.11694200  |
| O | -0.51422300 | 1.21598400  | -0.59089900 |
| H | 0.52001000  | 1.27499000  | -0.09967900 |
| H | 0.52416900  | -1.27421100 | -0.09724400 |
| O | -0.51277200 | -1.21773500 | -0.58744000 |
| O | 1.65888100  | -1.08268500 | 0.37053400  |
| O | 2.09957500  | 0.00178300  | -0.19312600 |
| O | 1.65512300  | 1.08341500  | 0.37226600  |

TS6-7

|   |             |             |             |
|---|-------------|-------------|-------------|
| S | 1.06646500  | -0.13738600 | 0.03637000  |
| O | 1.05855600  | -0.86185400 | -1.17151700 |
| O | 1.71934400  | 1.11365000  | 0.12657300  |
| H | -0.86524500 | 1.70916700  | 0.44148400  |

|   |             |             |             |
|---|-------------|-------------|-------------|
| H | -1.57321400 | -1.14939300 | 0.73402100  |
| O | 0.55344700  | -0.72928100 | 1.22094800  |
| O | -1.97341700 | -0.89158900 | -0.11101600 |
| O | -2.20230000 | 0.45802100  | 0.03105000  |
| O | -0.98375300 | 1.11585400  | -0.31571500 |

TS7-8

|   |             |             |             |
|---|-------------|-------------|-------------|
| S | -0.87983700 | -0.06824200 | -0.09110800 |
| O | -1.56673600 | -0.62881400 | 1.01087900  |
| O | -1.31154900 | 1.13727100  | -0.68493600 |
| H | 1.42535800  | -0.51700800 | 0.90302200  |
| H | 1.46690700  | -0.96417800 | -0.68155700 |
| O | -0.14940200 | -0.98896600 | -0.94148700 |
| O | 2.14128600  | -0.54048700 | -0.04872000 |
| O | 1.63806900  | 0.80359200  | -0.07709900 |
| O | 0.64647200  | 0.53903500  | 0.89589600  |

TS7-9

|   |             |             |             |
|---|-------------|-------------|-------------|
| S | -0.84997400 | 0.16924000  | 0.06212900  |
| O | -1.58229300 | 0.61941900  | -1.05238400 |
| O | -0.24379400 | 1.08284000  | 0.95869000  |
| H | 1.83556900  | 1.21936300  | 0.32923500  |
| H | -0.17504800 | -1.52042600 | 0.03362000  |
| O | -1.25036200 | -1.14761000 | 0.62783300  |
| O | 0.56271300  | -0.81102400 | -0.63039400 |
| O | 1.72545400  | -0.61530100 | 0.16856800  |
| O | 2.28066400  | 0.57082700  | -0.24192700 |

TS7-P

|   |             |             |             |
|---|-------------|-------------|-------------|
| S | -0.83556400 | 0.09830400  | 0.08120800  |
| O | -1.85522600 | 0.27256000  | -0.88038800 |
| O | -1.06503800 | -0.70471700 | 1.22751300  |
| H | 0.14878700  | -1.80524300 | -0.61099500 |
| H | 1.35207800  | 1.11939800  | 0.23059100  |
| O | 0.01031400  | 1.27802800  | 0.29544200  |
| O | 2.21236800  | 0.53611000  | -0.11764000 |
| O | 1.83857400  | -0.61771800 | 0.17278400  |
| O | 0.34252800  | -0.87514000 | -0.81257700 |

TS8-4

|   |             |             |             |
|---|-------------|-------------|-------------|
| S | -0.88021400 | 0.12271800  | 0.07113400  |
| O | -1.78789300 | 0.11678300  | -1.01014700 |
| O | -1.13714400 | -0.61178000 | 1.25123800  |
| H | 2.57106200  | 0.62755200  | -0.82748100 |



|   |             |             |             |
|---|-------------|-------------|-------------|
| H | 1.39781900  | 1.07750500  | 0.20593200  |
| O | -0.06568500 | 1.32070300  | 0.22751000  |
| O | 2.28554800  | 0.55953700  | 0.09577800  |
| O | 1.46906400  | -0.96032900 | 0.08544600  |
| O | 0.50042600  | -0.88348100 | -0.71440000 |

TS8-9

|   |             |             |             |
|---|-------------|-------------|-------------|
| S | -0.72851900 | -0.02624900 | -0.13137900 |
| O | -1.92918700 | 0.68326000  | 0.09396000  |
| O | -0.48774700 | -0.80593200 | -1.27383000 |
| H | 1.95764400  | -0.94830900 | 0.75775000  |
| H | -0.87176000 | -0.57258300 | 1.89643400  |
| O | -0.43527300 | -0.94844700 | 1.11917600  |
| O | 2.01250900  | -0.56822500 | -0.13209000 |
| O | 1.79021000  | 0.76748000  | 0.06823300  |
| O | 0.37078900  | 1.11447500  | 0.05553600  |

TS9-P

|   |             |             |             |
|---|-------------|-------------|-------------|
| S | 0.68806100  | -0.10371100 | 0.06842200  |
| O | 1.88470900  | -0.59017700 | 0.63935500  |
| O | -0.08261300 | -1.06586700 | -0.74382100 |
| H | -1.32676500 | -0.92119700 | -0.59921600 |
| H | 1.75281000  | 1.55877500  | -0.65895800 |
| O | 1.03031100  | 1.00820600  | -0.98909200 |
| O | -2.23642300 | -0.45450100 | -0.05020400 |
| O | -1.80715200 | 0.70118400  | 0.09740600  |
| O | -0.21820900 | 0.52887800  | 1.06678400  |

TSR-14

|   |             |             |             |
|---|-------------|-------------|-------------|
| S | 0.53963900  | -0.08140300 | -0.11478600 |
| O | 1.28270500  | -0.98140200 | -0.93962200 |
| O | 0.58059700  | -0.48279400 | 1.42848300  |
| H | -0.09920200 | -1.15675800 | 1.58279300  |
| H | 2.35172300  | 0.99345900  | -0.19880900 |
| O | 1.43791000  | 1.21883900  | 0.03468100  |
| O | -1.50480400 | -0.91242800 | -0.34183000 |
| O | -1.90591000 | 0.19391000  | 0.21847000  |
| O | -1.25134100 | 1.14709200  | -0.34360700 |

TSR-15

|   |             |             |             |
|---|-------------|-------------|-------------|
| S | -0.66958200 | -0.08772800 | -0.42729100 |
| O | 0.03771000  | 1.14553000  | 0.20166500  |
| O | -0.73645500 | -1.21254700 | 0.69302100  |
| H | -1.45510500 | -0.99479400 | 1.30485700  |

|   |             |             |             |
|---|-------------|-------------|-------------|
| H | -2.48144500 | 1.15436500  | -0.51312600 |
| O | -2.20039300 | 0.42438200  | 0.05016800  |
| O | 1.72243000  | 0.93862000  | 0.24993700  |
| O | 1.82474500  | -0.32739400 | 0.32462000  |
| O | 1.18319700  | -0.81308200 | -0.76379500 |

TS15-P

|   |             |             |             |
|---|-------------|-------------|-------------|
| S | -0.62627600 | 0.09120500  | -0.33786200 |
| O | 0.05603100  | -0.57338500 | 0.88593700  |
| O | -1.99868400 | -0.66009500 | -0.46144500 |
| H | -2.40642100 | -0.82770200 | 0.40455800  |
| H | -0.44761100 | 2.00087200  | 0.52872800  |
| O | -1.19439800 | 1.40166700  | 0.36655200  |
| O | 0.89814600  | -1.52153200 | 0.23256600  |
| O | 2.16398400  | 0.01164500  | -0.48464000 |
| O | 1.68422900  | 1.01264500  | 0.02009400  |

TS14-P

|   |             |             |             |
|---|-------------|-------------|-------------|
| S | 0.39086400  | 0.11225400  | 0.05562200  |
| O | 0.68008500  | 1.39310400  | 0.57760000  |
| O | 0.25637400  | -0.04488600 | -1.48997400 |
| H | 1.00922100  | -0.55968100 | -1.81925500 |
| H | 2.37535000  | -0.15644200 | 0.72041400  |
| O | 1.78064900  | -0.67807000 | 0.16561500  |
| O | -1.62219700 | 0.70569600  | -0.10938600 |
| O | -1.87081600 | -0.55313200 | 0.09200400  |
| O | -0.42889600 | -0.95770600 | 0.79025100  |

TS14-2

|   |             |             |             |
|---|-------------|-------------|-------------|
| S | 0.45779500  | -0.09943300 | -0.06024800 |
| O | 0.82417000  | -0.85690300 | -1.19294200 |
| O | 0.21399600  | -0.75919000 | 1.29006500  |
| H | -0.78489300 | -1.01647500 | 1.08950300  |
| H | 2.38785900  | 0.64045600  | -0.36183000 |
| O | 1.71664000  | 0.75058700  | 0.32519300  |
| O | -1.57786200 | -0.71538800 | -0.16375400 |
| O | -1.81510500 | 0.65475000  | -0.03822800 |
| O | -0.47779900 | 1.17201200  | -0.19079700 |

TS5-10

|   |             |             |             |
|---|-------------|-------------|-------------|
| H | -0.68736700 | 1.23190100  | 0.00381400  |
| S | 1.28015700  | 0.07523400  | -0.37721700 |
| O | 0.46204500  | 1.34465400  | -0.34847100 |
| O | 1.63480200  | -0.19868300 | 1.15904300  |

|   |             |             |             |
|---|-------------|-------------|-------------|
| H | 0.82774600  | -0.34109800 | 1.67762000  |
| O | 0.37259900  | -1.06091400 | -0.74782800 |
| O | -1.22845200 | -1.08414000 | 0.30629400  |
| O | -2.00884500 | -0.25132900 | -0.15486600 |
| O | -1.81001100 | 0.98859400  | 0.33008200  |

TS10-12

|   |             |             |             |
|---|-------------|-------------|-------------|
| H | -2.27066100 | 1.69367800  | -0.17964100 |
| S | 1.34385600  | -0.16198200 | -0.09853400 |
| O | 1.18099600  | 0.94917100  | -0.98837000 |
| O | 0.91635300  | 0.28244300  | 1.36275700  |
| H | 0.10622800  | 0.82284100  | 1.32516100  |
| O | 0.06025500  | -1.23969600 | -0.39799000 |
| O | -1.13622400 | -1.00523100 | 0.30547400  |
| O | -1.88870700 | -0.12667900 | -0.39087300 |
| O | -1.54982900 | 1.14939000  | 0.16287900  |

TS12-13

|   |             |             |             |
|---|-------------|-------------|-------------|
| H | 2.65875300  | 0.92718400  | -0.33037100 |
| S | -1.32121400 | -0.10802300 | -0.10765000 |
| O | -1.21045700 | -0.04965000 | 1.32157000  |
| O | -0.84703900 | 1.28220000  | -0.71648700 |
| H | 0.00844800  | 1.57467500  | -0.35445100 |
| O | -0.15374500 | -1.11534400 | -0.71365200 |
| O | 1.24017500  | -1.08952700 | -0.30714200 |
| O | 1.49905400  | -0.18053300 | 0.66174100  |
| O | 1.78104000  | 1.05616800  | 0.05487300  |

TS10-11

|   |             |             |             |
|---|-------------|-------------|-------------|
| H | -1.98311300 | 0.83957000  | -1.19252600 |
| S | 1.09716600  | 0.36389500  | -0.38383800 |
| O | 0.78342500  | 1.17268900  | 0.75511800  |
| O | 2.34574200  | -0.55808700 | -0.02162400 |
| H | 2.30285100  | -0.84613700 | 0.90463100  |
| O | -0.05044400 | -0.90004800 | -0.41245100 |
| O | -0.96817900 | -0.80711800 | 0.64411000  |
| O | -2.18052500 | -0.49486900 | 0.08101100  |
| O | -2.16431800 | 0.86046300  | -0.24250200 |

TS13-4

|   |             |             |             |
|---|-------------|-------------|-------------|
| H | 2.13052600  | 1.63529400  | 0.61651100  |
| S | -1.23846400 | -0.00842400 | -0.19467600 |
| O | -1.76680200 | -0.13328000 | 1.12978200  |
| O | -0.58170000 | 1.34355800  | -0.45380800 |

|                               |             |             |             |
|-------------------------------|-------------|-------------|-------------|
| H                             | 0.52524400  | 1.30914400  | -0.32323500 |
| O                             | -0.42442600 | -1.07235500 | -0.78638300 |
| O                             | 1.48160200  | -1.23346000 | -0.13435700 |
| O                             | 1.64872600  | -0.32825300 | 0.68954700  |
| O                             | 1.78755800  | 1.07258400  | -0.09208900 |
| TS11-P                        |             |             |             |
| H                             | -0.92708800 | 1.05123600  | -1.41770200 |
| S                             | 0.74121400  | 0.25085300  | -0.14672900 |
| O                             | 0.95665800  | 0.65779500  | 1.20257100  |
| O                             | 2.08349400  | -0.61310600 | -0.49566100 |
| H                             | 2.63263400  | -0.71144200 | 0.29791400  |
| O                             | -0.32679400 | -1.08862000 | -0.22861700 |
| O                             | -1.44926100 | -0.73626200 | 0.56242400  |
| O                             | -2.26830500 | -0.04058300 | -0.10016500 |
| O                             | -0.69141400 | 1.27659400  | -0.50712100 |
| TS16-P                        |             |             |             |
| S                             | -0.95430700 | 0.00000000  | -0.28104400 |
| O                             | -2.39429300 | -0.00005500 | -0.46103700 |
| O                             | -0.63875700 | 1.23877400  | 0.66245700  |
| H                             | -1.46575500 | 1.53799600  | 1.07041900  |
| H                             | -1.46570600 | -1.53812800 | 1.07032900  |
| O                             | -0.63868400 | -1.23876500 | 0.66246200  |
| O                             | 1.04349500  | 0.00006600  | -0.86058700 |
| O                             | 1.85619100  | 0.00008900  | 0.32839100  |
| O                             | 3.04709600  | -0.00009300 | -0.03719200 |
| HSO <sub>3</sub> <sup>-</sup> |             |             |             |
| S                             | -0.17756600 | 0.03959900  | -0.37844700 |
| O                             | -0.04678400 | 1.37215800  | 0.25545200  |
| O                             | 1.33951900  | -0.62505000 | 0.06826800  |
| H                             | 1.59376100  | -0.06984600 | 0.81608300  |
| O                             | -1.13682200 | -0.81757600 | 0.33116400  |
| HSO <sub>4</sub> <sup>-</sup> |             |             |             |
| S                             | 0.14184500  | 0.03027000  | -0.00560800 |
| O                             | 0.90207800  | -1.19098500 | -0.06654100 |
| O                             | 0.15954600  | 0.83554400  | -1.20926100 |
| H                             | -1.95961600 | 0.24728100  | 0.04603000  |
| O                             | 0.30191600  | 0.79992400  | 1.21025700  |
| O                             | -1.40227700 | -0.53593400 | 0.07100700  |

Int1'

|       |             |             |             |
|-------|-------------|-------------|-------------|
| S     | -0.80413400 | -0.15460000 | -0.08149800 |
| O     | -1.88113600 | -1.08472100 | -0.46884000 |
| O     | -1.63195500 | 1.31501400  | -0.20333200 |
| H     | -2.55485700 | 1.03908600  | -0.26379300 |
| O     | -0.43621300 | -0.23195900 | 1.33329800  |
| O     | 2.02557800  | -0.98142600 | -0.41773000 |
| O     | 2.08062600  | 0.05552500  | 0.26662500  |
| O     | 1.77072400  | 1.10688000  | -0.31405100 |
| Int2' |             |             |             |
| S     | 0.77900500  | 0.07450300  | -0.05299400 |
| O     | 1.70339700  | 0.22459100  | 1.03343200  |
| O     | 0.15725000  | 1.30344100  | -0.52259800 |
| H     | -1.65337900 | 1.08701000  | -0.27634400 |
| O     | 1.16452200  | -0.82674600 | -1.10123800 |
| O     | -0.48317200 | -0.68810100 | 0.76213800  |
| O     | -1.58656500 | -0.74455900 | -0.10279800 |
| O     | -2.30676900 | 0.44649200  | 0.07159400  |
| Int3' |             |             |             |
| H     | -0.20899000 | 1.28762400  | 0.14847200  |
| S     | 1.48117300  | -0.00279800 | -0.26861500 |
| O     | 0.70363900  | 1.45635800  | -0.15352100 |
| O     | 1.76107100  | -0.39539600 | 1.11617500  |
| O     | 0.43125200  | -0.86651200 | -0.88139000 |
| O     | -1.48714900 | -1.06580600 | 0.36905200  |
| O     | -2.22035100 | -0.24504900 | -0.16866300 |
| O     | -2.12468500 | 0.96104800  | 0.23701700  |
| Int4' |             |             |             |
| H     | -0.89896700 | 1.30676700  | 0.08618600  |
| S     | 1.31797400  | 0.03303200  | -0.29314500 |
| O     | 0.61693300  | 1.33232900  | -0.46046900 |
| O     | 1.66290800  | -0.21864600 | 1.09959400  |
| O     | 0.02183500  | -1.11285100 | -0.62830300 |
| O     | -1.03086700 | -1.07402700 | 0.30549100  |
| O     | -1.99308000 | -0.20042800 | -0.17470100 |
| O     | -1.80130700 | 1.04421200  | 0.43390600  |
| Int5' |             |             |             |
| H     | -1.12807200 | 1.11588300  | -0.82019300 |
| S     | 1.07424500  | 0.33490700  | -0.14953100 |
| O     | 1.42546900  | 0.56626700  | 1.24144600  |
| O     | 2.07580500  | -0.38618600 | -0.92243700 |

|        |             |             |             |
|--------|-------------|-------------|-------------|
| O      | -0.09711700 | -1.06982800 | -0.04068700 |
| O      | -1.21573500 | -0.71165200 | 0.70883100  |
| O      | -2.18851100 | -0.29391700 | -0.18275500 |
| O      | -2.00739300 | 1.08601600  | -0.40281300 |
| Int6'  |             |             |             |
| S      | -0.70788100 | -0.30267600 | -0.32219900 |
| O      | 0.13625200  | 1.06866400  | 0.32866700  |
| O      | -0.99719800 | -1.21845900 | 0.75726600  |
| H      | -1.98535000 | 1.47530500  | -0.62588800 |
| O      | -2.12026100 | 0.68711600  | -0.09114400 |
| O      | 1.51030200  | 1.07781700  | 0.03447500  |
| O      | 1.94008900  | -0.22438700 | 0.29504500  |
| O      | 1.19474600  | -0.96981300 | -0.60167600 |
| TS1-2' |             |             |             |
| S      | -1.20713600 | -0.25869500 | -0.24704100 |
| O      | -2.62779300 | -0.08647200 | 0.08032700  |
| O      | -0.61174300 | 1.32255700  | -0.41099400 |
| H      | -0.37631900 | 1.57229400  | 0.49367700  |
| O      | -0.43524800 | -0.67950100 | 0.94989900  |
| O      | 1.93796800  | -0.63976000 | -0.97163300 |
| O      | 1.99015500  | -0.38215200 | 0.22892500  |
| O      | 2.20797100  | 0.78618000  | 0.55584900  |
| TS2-P' |             |             |             |
| S      | -0.74902500 | -0.01654700 | 0.01668000  |
| O      | -1.85026300 | 0.36433300  | -0.81323300 |
| O      | -0.01232800 | 1.26901800  | 0.47710700  |
| H      | 1.02455000  | 1.12287700  | 0.38646900  |
| O      | -1.04685300 | -0.82539700 | 1.15854900  |
| O      | 0.30345500  | -0.69711700 | -0.88994900 |
| O      | 1.73264800  | -0.70085800 | 0.01704200  |
| O      | 2.24332400  | 0.48275500  | -0.03118400 |
| TS1-P' |             |             |             |
| S      | -0.81083900 | -0.09652700 | 0.01221100  |
| O      | -1.87118500 | -1.05530500 | -0.31852200 |
| O      | -1.51379900 | 1.33968800  | -0.49593500 |
| H      | -2.37376900 | 1.06228100  | -0.83340600 |
| O      | -0.55702300 | 0.10773200  | 1.42761300  |
| O      | 1.36925200  | -0.93882200 | -0.55888600 |
| O      | 2.07768400  | -0.27573400 | 0.22418600  |
| O      | 2.41347000  | 0.88271000  | -0.19870300 |

## TS3-4'

|   |             |             |             |
|---|-------------|-------------|-------------|
| H | -0.45420100 | 1.26480500  | -0.03959100 |
| S | 1.34070700  | 0.00410200  | -0.27969300 |
| O | 0.51667000  | 1.35831200  | -0.39633300 |
| O | 1.74034500  | -0.16026300 | 1.11574300  |
| O | 0.32164800  | -1.05853300 | -0.68886300 |
| O | -1.27965100 | -1.08149600 | 0.34410700  |
| O | -2.05568900 | -0.23114800 | -0.14354200 |
| O | -1.86796100 | 1.00682300  | 0.33322300  |

## TS4-5'

|   |             |             |             |
|---|-------------|-------------|-------------|
| H | -1.15002200 | 1.26375700  | -0.50051800 |
| S | 1.07036200  | 0.27389700  | -0.29713000 |
| O | 0.89335300  | 1.13402500  | 0.86886500  |
| O | 2.32928200  | -0.45421700 | -0.34826600 |
| O | 0.04429100  | -1.17511300 | 0.13960100  |
| O | -1.18188100 | -0.81153900 | 0.68325000  |
| O | -2.01251000 | -0.40190800 | -0.35984000 |
| O | -2.06950800 | 1.00298900  | -0.32678500 |

## TS5-2'

|   |             |             |             |
|---|-------------|-------------|-------------|
| H | -0.90690700 | 1.00527400  | -1.30580700 |
| S | 0.96415300  | 0.18982000  | -0.08632000 |
| O | 1.15119000  | 0.43222900  | 1.32022100  |
| O | 2.04942300  | -0.51965600 | -0.73643200 |
| O | -0.38934900 | -1.09143600 | -0.19834000 |
| O | -1.48093400 | -0.71581800 | 0.53504500  |
| O | -2.30914300 | 0.00541600  | -0.15897500 |
| O | -0.83612900 | 1.38396500  | -0.42565400 |

## TSR-6'

|   |             |             |             |
|---|-------------|-------------|-------------|
| S | -0.88640400 | -0.34521800 | -0.23893100 |
| O | 0.03857200  | 0.30617900  | 0.92346500  |
| O | -1.92657500 | -0.96691000 | 0.56346600  |
| H | -1.85236700 | 1.54417600  | -0.01227400 |
| O | -1.52999000 | 1.05975600  | -0.78586900 |
| O | 1.22671100  | 0.95403200  | 0.27530600  |
| O | 2.22479600  | 0.03283900  | 0.24758700  |
| O | 1.97084000  | -0.88848300 | -0.74455700 |

## TS6-P'

|   |             |             |             |
|---|-------------|-------------|-------------|
| S | -0.62647500 | -0.30003500 | -0.24721900 |
| O | 0.24522900  | 1.06997600  | 0.31551200  |

|   |             |             |             |
|---|-------------|-------------|-------------|
| O | -0.96117700 | -1.11344000 | 0.89672900  |
| H | -1.97940500 | 1.43318200  | -0.77758700 |
| O | -2.10352000 | 0.75199000  | -0.10871400 |
| O | 1.64188200  | 0.93108800  | 0.08621700  |
| O | 1.97812100  | -0.35042900 | 0.25873300  |
| O | 0.69984000  | -0.86826300 | -0.85684100 |
